# Supplementary material for: Effect of Hot- and Cold-Water Treatment on Broccoli Bioactive Compounds, Oxidative Stress Parameters and Biological Effects of Their Extracts
Source: MDPI journal article supplement (doi:10.3390/plants12051135), 2023-03-02
Supplement: s1 [file s1]

**Table S1.**

|                         |                  | Con               | CT                | HT                |
|-------------------------|------------------|-------------------|-------------------|-------------------|
| <i>p</i> -Coumaric acid | Salivary phase   | 107.83 ± 1.56 B a | 99.93 ± 3.34 AB b | 97.07 ± 2.51 A b  |
|                         | Gastric phase    | 134.14 ± 4.47 A a | 104.34 ± 2.63 A b | 98.42 ± 4.72 A b  |
|                         | Intestinal phase | 128.94 ± 7.25 A a | 97.92 ± 0.83 B b  | 103.92 ± 2.96 A b |
| Ferulic acid            | Salivary phase   | 97.59 ± 7.59 B a  | 104.60 ± 5.27 B a | 102.53 ± 4.73 A a |
|                         | Gastric phase    | 105.43 ± 6.07 B a | 103.93 ± 3.99 B a | 104.67 ± 2.31 A a |
|                         | Intestinal phase | 121.73 ± 2.15 A a | 117.76 ± 1.73 A a | 100.98 ± 1.41 A b |
| Sinapic acid            | Salivary phase   | 76.51 ± 5.32 B c  | 122.85 ± 4.84 A a | 97.33 ± 5.50 A b  |
|                         | Gastric phase    | 103.13 ± 6.06 A b | 126.95 ± 7.23 A a | 99.90 ± 4.18 A b  |
|                         | Intestinal phase | 109.14 ± 9.36 A b | 131.84 ± 3.77 A a | 102.61 ± 6.62 A b |
| Kaempferol              | Salivary phase   | 94.75 ± 2.81 A b  | 101.79 ± 2.83 A a | 97.53 ± 0.75 A ab |
|                         | Gastric phase    | 95.54 ± 2.55 A b  | 101.49 ± 0.91 A a | 97.96 ± 2.47 A ab |
|                         | Intestinal phase | nd                | nd                | nd                |
| <i>L</i> -ascorbic acid | Salivary phase   | 98.20 ± 1.47 A ab | 102.55 ± 2.39 A a | 95.67 ± 3.45 A b  |
|                         | Gastric phase    | 96.20 ± 2.33 A a  | 98.95 ± 3.47 A a  | 94.06 ± 1.44 A a  |
|                         | Intestinal phase | 98.35 ± 5.49 A ab | 105.28 ± 3.42 A a | 90.98 ± 3.67 A b  |

Values represent mean ± standard deviation of 3 replicates.

Different capital letters indicate a significant difference among the values in a column, and different small letters indicate a significant difference among the values in a row (ANOVA, Duncan test,  $p \leq 0.05$ ).
