# Supplementary material for: Effect of Hot- and Cold-Water Treatment on Broccoli Bioactive Compounds, Oxidative Stress Parameters and Biological Effects of Their Extracts
Source: MDPI journal article supplement (doi:10.3390/plants12051135), 2023-03-02
Supplement: s1 [file s1]

**Vitamin C**

| Mass (µg)       | Abs    | Found conc (µg) | Recovery (%) |
|-----------------|--------|-----------------|--------------|
| 0,01            | 41,13  | 0,01            | 103,38       |
| 0,025           | 108,76 | 0,02            | 94,37        |
| 0,05            | 250,51 | 0,05            | 102,75       |
| 0,1             | 497,71 | 0,10            | 99,82        |
| 0,15            | 753,08 | 0,15            | 99,92        |
| 0,2             | 747,15 | 0,15            | 74,36        |
| Mean            |        |                 | 95,77        |
| SD              |        |                 | 10,96        |
| SE of Intercept |        |                 | 55,29        |
| SD of Intercept |        |                 | 135,44       |
| LOD             |        |                 | 0,06         |
| LOQ             |        |                 | 0,17         |

| Parameter               | Value         |
|-------------------------|---------------|
| Accuracy                | 95,77 ± 10,96 |
| Slope                   | 5102,3        |
| Intercept               | -11,619       |
| Linearity range         | 0,01-0,20 µg  |
| Correlation coefficient | 0,999849989   |
| SE of intercept         | 55,29         |
| SD of intercept         | 135,44        |
| LOD                     | 0,06          |
| LOQ                     | 0,17          |

**p-Coumaric acid**

| Mass (µg)       | Abs     | Found conc (µg) | Recovery (%) |
|-----------------|---------|-----------------|--------------|
| 0,01            | 175,16  | 0,02            | 236,67       |
| 0,025           | 453,44  | 0,06            | 226,96       |
| 0,05            | 908,12  | 0,11            | 221,55       |
| 0,1             | 1821,45 | 0,22            | 219,32       |
| 0,15            | 2762,26 | 0,33            | 220,75       |
| 0,2             | 3848,72 | 0,46            | 230,13       |
| Mean            |         |                 | 225,90       |
| SD              |         |                 | 6,69         |
| SE of Intercept |         |                 | 36,56        |
| SD of Intercept |         |                 | 89,56        |
| LOD             |         |                 | 0,03         |
| LOQ             |         |                 | 0,10         |

| Parameter               | Value         |
|-------------------------|---------------|
| Accuracy                | 225,90 ± 6,69 |
| Slope                   | 18442         |
| Intercept               | -11,523       |
| Linearity range         | 0,01-0,20 µg  |
| Correlation coefficient | 1             |
| SE of intercept         | 36,56         |
| SD of intercept         | 89,56         |
| LOD                     | 0,03          |
| LOQ                     | 0,10          |

**Ferulic acid**

| Mass (µg)       | Abs     | Found conc (µg) | Recovery (%) |
|-----------------|---------|-----------------|--------------|
| 0,01            | 85,07   | 0,01            | 129,60       |
| 0,025           | 161,34  | 0,02            | 88,10        |
| 0,05            | 387,68  | 0,05            | 97,85        |
| 0,1             | 828,43  | 0,10            | 101,30       |
| 0,15            | 1236,38 | 0,15            | 99,86        |
| 0,2             | 2181,18 | 0,26            | 131,04       |
| Mean            |         |                 | 107,96       |
| SD              |         |                 | 17,93        |
| SE of Intercept |         |                 | 110,88       |
| SD of Intercept |         |                 | 271,61       |
| LOD             |         |                 | 0,11         |
| LOQ             |         |                 | 0,35         |

| Parameter               | Value          |
|-------------------------|----------------|
| Accuracy                | 107,96 ± 17,93 |
| Slope                   | 8414,3         |
| Intercept               | -23,978        |
| Linearity range         | 0,01-0,26 µg   |
| Correlation coefficient | 0,999249719    |
| SE of intercept         | 110,88         |
| SD of intercept         | 271,61         |
| LOD                     | 0,11           |
| LOQ                     | 0,35           |

**Sinapic acid**

| Mass (µg)       | Abs     | Found conc (µg) | Recovery (%) |
|-----------------|---------|-----------------|--------------|
| 0,01            | 72,06   | 0,01            | 114,14       |
| 0,025           | 177,26  | 0,02            | 95,66        |
| 0,05            | 423,35  | 0,05            | 106,33       |
| 0,1             | 893,99  | 0,11            | 109,10       |
| 0,15            | 1339,13 | 0,16            | 108,00       |
| 0,2             | 2318,9  | 0,28            | 139,22       |
| Mean            |         |                 | 112,07       |
| SD              |         |                 | 14,62        |
| SE of Intercept |         |                 | 109,34       |
| SD of Intercept |         |                 | 267,84       |
| LOD             |         |                 | 0,10         |
| LOQ             |         |                 | 0,29         |

| Parameter               | Value          |
|-------------------------|----------------|
| Accuracy                | 112,07 ± 14,62 |
| Slope                   | 9179,2         |
| Intercept               | -33,85         |
| Linearity range         | 0,01-0,28 µg   |
| Correlation coefficient | 0,999699955    |
| SE of intercept         | 109,34         |
| SD of intercept         | 267,84         |
| LOD                     | 0,10           |
| LOQ                     | 0,29           |

**Quercetin**

| Mass (µg)       | Abs     | Found conc (µg) | Recovery (%) |
|-----------------|---------|-----------------|--------------|
| 0,01            | 31,74   | 0,01            | 122,39       |
| 0,025           | 92,15   | 0,02            | 92,74        |
| 0,05            | 233,76  | 0,05            | 97,69        |
| 0,1             | 519,3   | 0,10            | 100,58       |
| 0,15            | 792,87  | 0,15            | 100,10       |
| 0,2             | 1467,88 | 0,27            | 136,23       |
| Mean            |         |                 | 108,29       |
| SD              |         |                 | 17,09        |
| SE of Intercept |         |                 | 84,53        |
| SD of Intercept |         |                 | 207,07       |
| LOD             |         |                 | 0,12         |
| LOQ             |         |                 | 0,38         |

| Parameter               | Value          |
|-------------------------|----------------|
| Accuracy                | 108,29 ± 17,09 |
| Slope                   | 5519           |
| Intercept               | -35,806        |
| Linearity range         | 0,01 - 0,27 µg |
| Correlation coefficient | 0,99959992     |
| SE of intercept         | 84,53          |
| SD of intercept         | 207,07         |
| LOD                     | 0,12           |
| LOQ                     | 0,38           |

**Isorhamnetin**

| Mass (µg)       | Abs     | Found conc (µg) | Recovery (%) |
|-----------------|---------|-----------------|--------------|
| 0,01            | 45,69   | 0,01            | 82,80        |
| 0,025           | 123,5   | 0,02            | 70,11        |
| 0,05            | 265,2   | 0,03            | 68,73        |
| 0,1             | 533,13  | 0,07            | 66,21        |
| 0,15            | 825,89  | 0,10            | 67,34        |
| 0,2             | 1170,26 | 0,14            | 70,96        |
| Mean            |         |                 | 71,02        |
| SD              |         |                 | 6,02         |
| SE of Intercept |         |                 | 15,68        |
| SD of Intercept |         |                 | 38,41        |
| LOD             |         |                 | 0,01         |
| LOQ             |         |                 | 0,04         |

| Parameter               | Value        |
|-------------------------|--------------|
| Accuracy                | 71,02 ± 6,02 |
| Slope                   | 5560,4       |
| Intercept               | -13,866      |
| Linearity range         | 0,01-0,20 µg |
| Correlation coefficient | 0,999849989  |
| SE of intercept         | 15,68        |
| SD of intercept         | 38,41        |
| LOD                     | 0,01         |
| LOQ                     | 0,04         |

**Kaempferol**

| Mass (µg)       | Abs     | Found conc (µg) | Recovery (%) |
|-----------------|---------|-----------------|--------------|
| 0,01            | 50,12   | 0,01            | 121,32       |
| 0,025           | 138,55  | 0,02            | 93,67        |
| 0,05            | 339,34  | 0,05            | 98,09        |
| 0,1             | 737,81  | 0,10            | 99,90        |
| 0,15            | 1134,37 | 0,15            | 100,34       |
| 0,2             | 1467,88 | 0,19            | 96,54        |
| Mean            |         |                 | 101,64       |
| SD              |         |                 | 9,94         |
| SE of Intercept |         |                 | 13,71        |
| SD of Intercept |         |                 | 33,58        |
| LOD             |         |                 | 0,01         |
| LOQ             |         |                 | 0,04         |

| Parameter               | Value         |
|-------------------------|---------------|
| Accuracy                | 101,64 ± 9,94 |
| Slope                   | 7835,5        |
| Intercept               | -44,942       |
| Linearity range         | 0,01-0,19 µg  |
| Correlation coefficient | 0,999699955   |
| SE of intercept         | 13,71         |
| SD of intercept         | 33,58         |
| LOD                     | 0,01          |
| LOQ                     | 0,04          |

**Luteolin**

| Mass (µg)       | Abs     | Found conc (µg) | Recovery (%) |
|-----------------|---------|-----------------|--------------|
| 0,01            | 70,58   | 0,01            | 112,38       |
| 0,025           | 191,99  | 0,03            | 102,67       |
| 0,05            | 408,77  | 0,05            | 102,86       |
| 0,1             | 813,58  | 0,10            | 99,54        |
| 0,15            | 1241,46 | 0,15            | 100,26       |
| 0,2             | 1756,62 | 0,21            | 105,81       |
| Mean            |         |                 | 103,92       |
| SD              |         |                 | 4,70         |
| SE of Intercept |         |                 | 21,59        |
| SD of Intercept |         |                 | 52,89        |
| LOD             |         |                 | 0,02         |
| LOQ             |         |                 | 0,06         |

| Parameter               | Value         |
|-------------------------|---------------|
| Accuracy                | 103,92 ± 4,70 |
| Slope                   | 8347,4        |
| Intercept               | -14           |
| Linearity range         | 0,01-0,20 µg  |
| Correlation coefficient | 0,999949999   |
| SE of intercept         | 21,59         |
| SD of intercept         | 52,89         |
| LOD                     | 0,02          |
| LOQ                     | 0,06          |
