# Supplementary material for: Effect of Hot- and Cold-Water Treatment on Broccoli Bioactive Compounds, Oxidative Stress Parameters and Biological Effects of Their Extracts
Source: Plants (Basel). 2023 Mar 2;12(5):1135. doi: 10.3390/plants12051135 (PMC10005114; doi:10.3390/plants12051135)
Supplement: Supplementary file 1 [file plants-12-01135-s001.zip]

Archive with 4 entries (4 files):
- Figures S1-S4.pdf
- table S1.pdf
- Table S2.pdf
- Table S3.pdf
