# Supplementary figures and images for: Effect of Hot- and Cold-Water Treatment on Broccoli Bioactive Compounds, Oxidative Stress Parameters and Biological Effects of Their Extracts
Source: MDPI journal article supplement (doi:10.3390/plants12051135), 2023-03-02

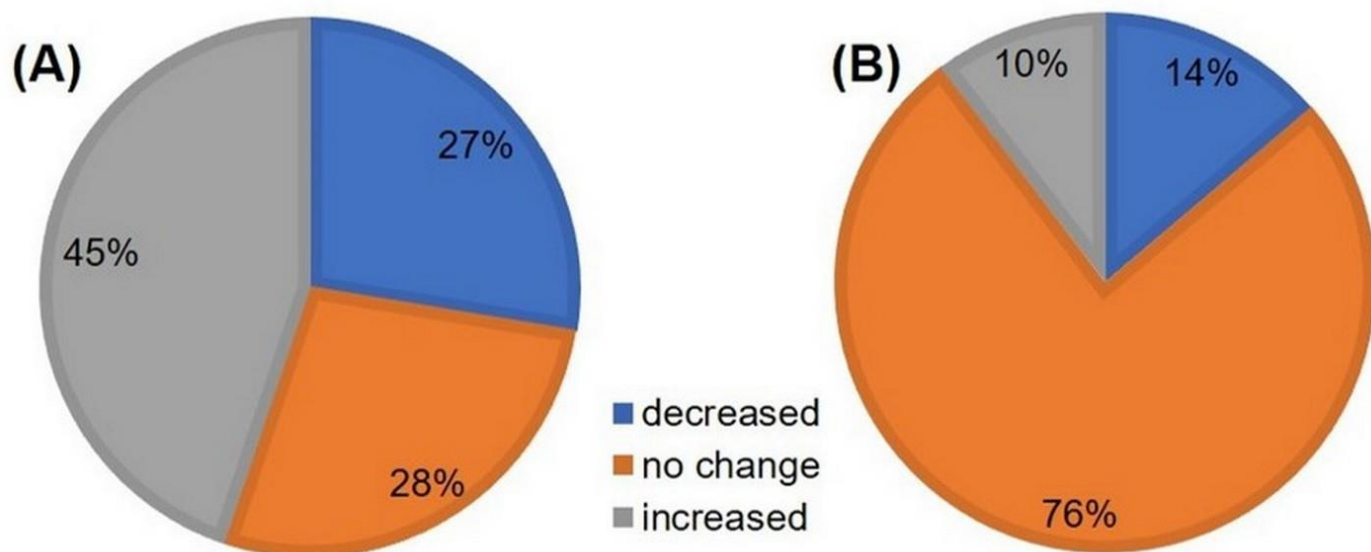

Figure S1

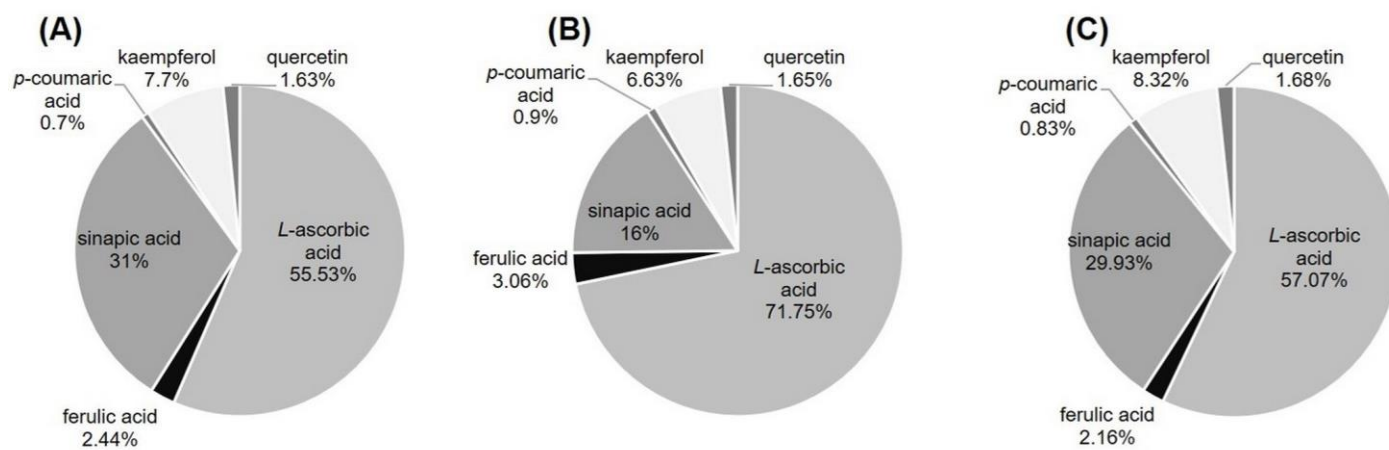

Figure S2

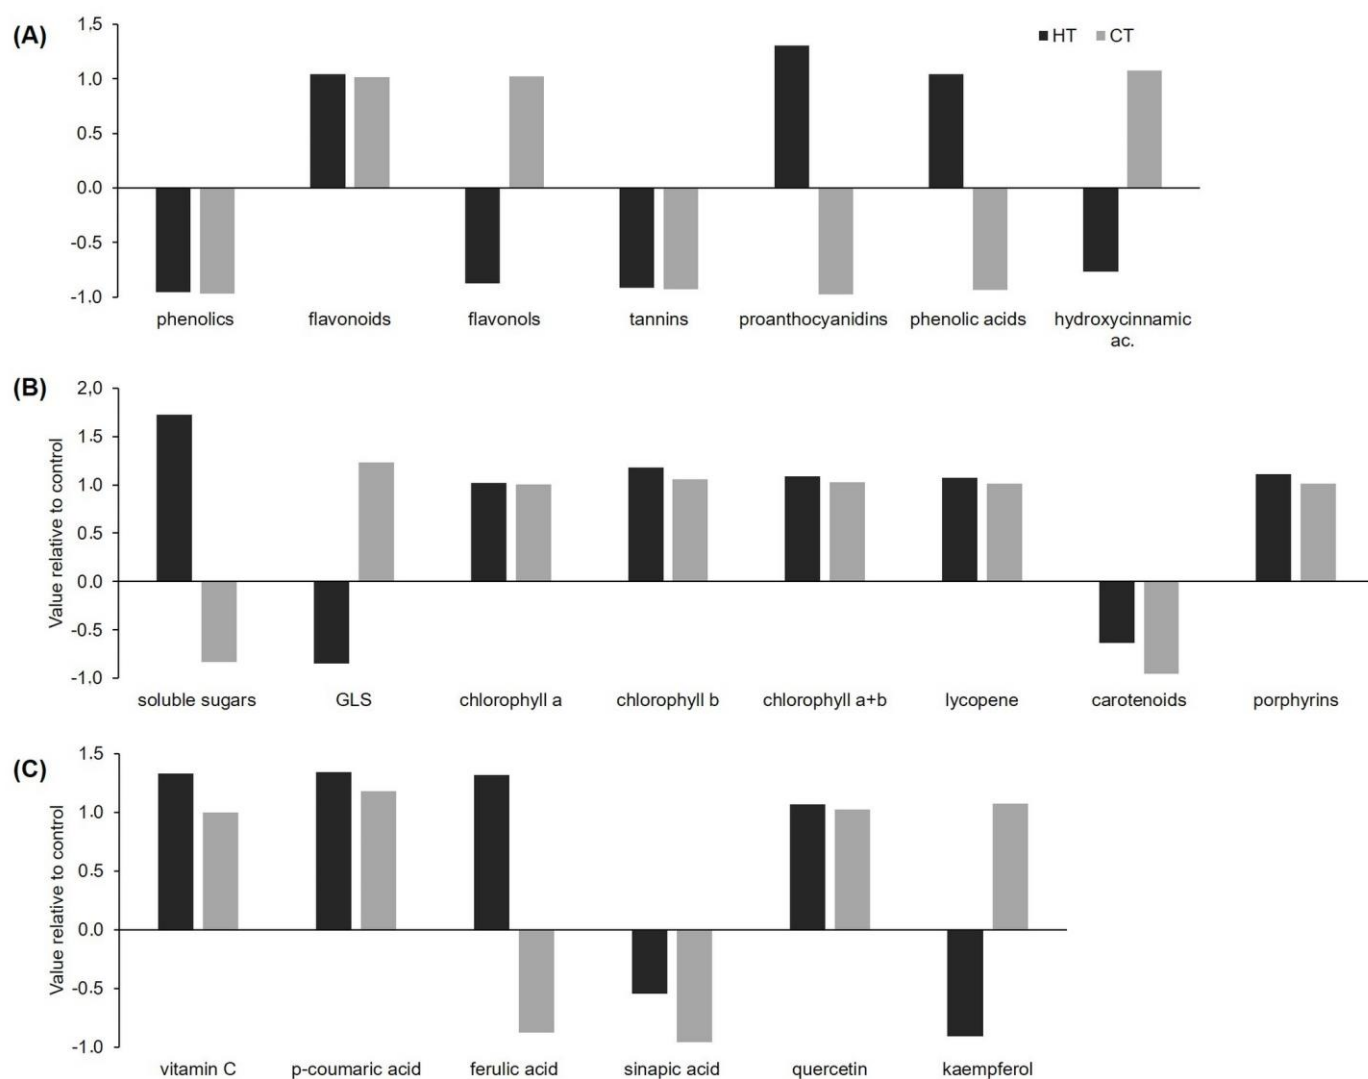

**Figure S3**

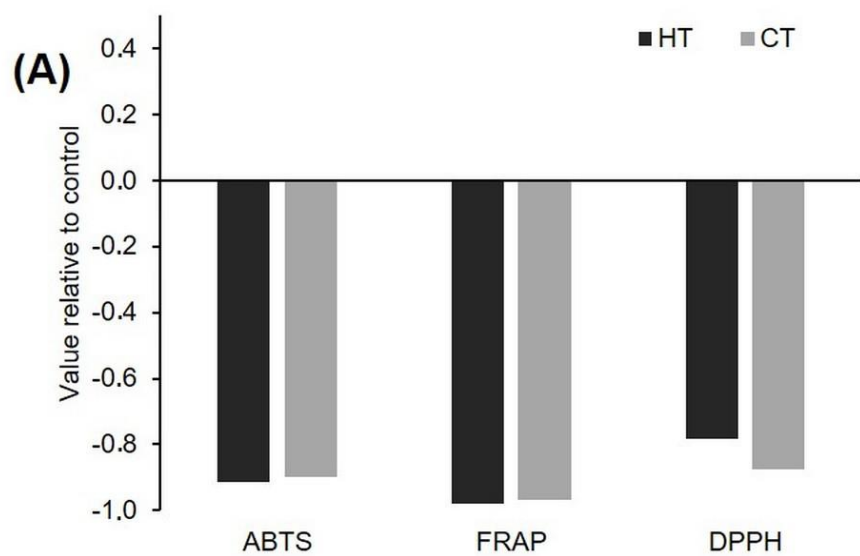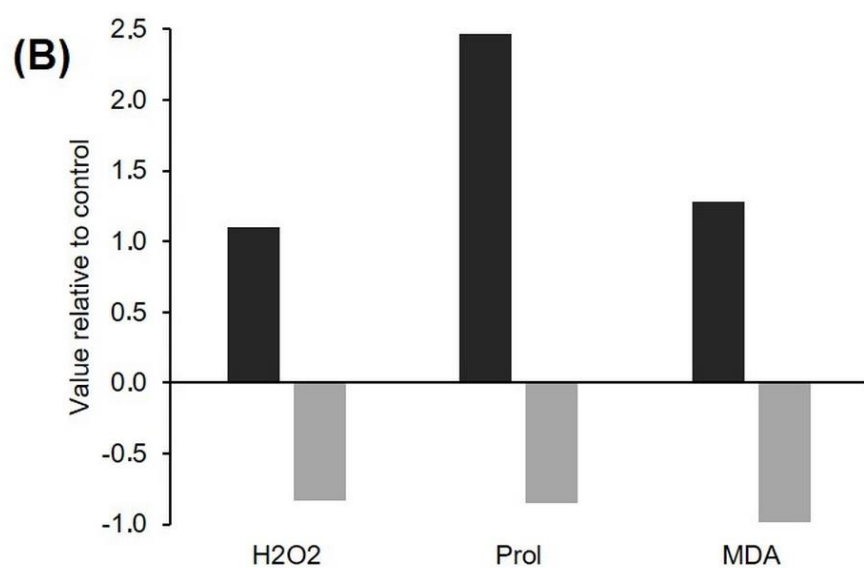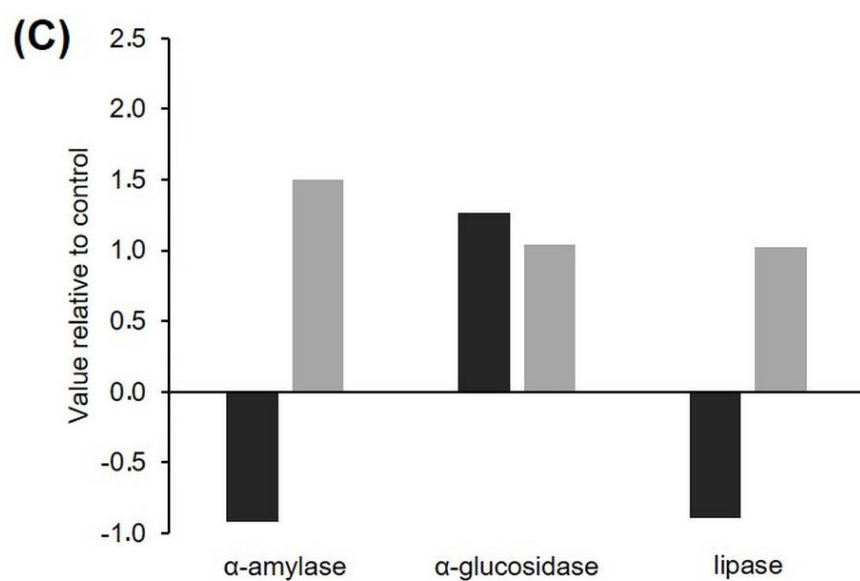

Figure S4

Supplement: s1 [file s1]
